# Supplementary material for: Policy and Practice Review: A First Guideline on the Use of Pharmacogenetics in Clinical Psychiatric Practice
Source: PubMed Central journal article supplement (PMC8117336; doi:10.3389/fphar.2021.640032), 2021-04-12
Supplement: datasheet1.pdf [file datasheet1.pdf]

## Addendum 1 Listing of Search terms for the Literature Search

The following search terms were used: ('pharmacogenetics'/de OR ('genotype'/exp AND ('pharmacology'/de)) OR (('genotype'/de OR 'genetic polymorphism'/exp OR 'phenotype'/exp OR 'allele'/de OR 'gene'/de OR 'genetic screening'/de OR 'genetic susceptibility'/de OR 'genetic variability'/de) AND ('cytochrome P450'/de OR 'cytochrome P450 3A4'/de OR 'cytochrome P450 2D6'/de OR 'cytochrome P450 2C9'/de OR 'cytochrome P450 2C19'/de OR 'cytochrome P450 1A2'/de)) OR (pharmacogenetic\* OR psychopharmacogenetic\* OR (genotyp\* NEAR/3 (pharmac\*)) OR ((genetic\* OR polymorph\* OR genotyp\* OR phenotyp\* OR DNA-variation\* OR gene OR allele\*) NEAR/6 (P450 OR P-450 OR CYP-3a4 OR CYP3a4 OR CYP-2d6 OR CYP2d6 OR CYP-2c9 OR CYP2c9 OR CYP-2c19 OR CYP2c19 OR CYP-1a2 OR CYP1a2)) OR ((poor\* OR ultra-rapid\* OR ultrarapid\* OR intermediate\*) NEAR/3 metaboliz\*) ):ab,ti) AND ('psychiatry'/exp/mj OR 'mental disease'/mj OR 'mental hospital'/mj OR 'mental patient'/mj OR 'mental health care'/mj OR 'depression'/exp/mj OR 'psychosis'/exp/mj OR 'anxiety disorder'/exp/mj OR 'mood disorder'/mj OR 'psychopharmacology'/mj OR 'psychopharmacotherapy'/mj OR 'psychotropic agent'/mj OR 'antidepressant agent'/mj OR 'neuroleptic agent'/mj OR 'atypical antipsychotic agent'/mj OR 'haloperidol'/mj OR 'risperidone'/mj OR 'aripiprazole'/mj OR 'clomipramine'/mj OR 'imipramine'/mj OR 'nortriptyline'/mj OR 'paroxetine'/mj OR 'sertraline'/mj OR 'duloxetine'/mj OR 'venlafaxine'/mj OR 'mirtazapine'/mj OR 'moclobemide'/mj OR 'doxepin'/mj OR 'neuroleptic malignant syndrome'/mj OR 'delirium'/mj OR 'autism'/exp/mj OR (psychiatr\* OR neuropsychiatr\* OR psychotropic\* OR psychopharmacogenetic\* OR ((mental OR anxiet\* OR mood) NEAR/3 (disease\* OR disorder\* OR patient\* OR hospital\* OR healthcare OR health-care)) OR depression\* OR psychosis\* OR psychoses\* OR psychotic\* OR antipsychotic\* OR psychopharmac\* OR antidepress\* OR anti-depress\* OR schizophreni\* OR bipolar\* OR neuroleptic\* OR delirium OR delusion\* OR autis\* OR (obsessi\* NEAR/3 compulsi\*) OR hallucinat\* OR haldol OR haloperidol OR risperidon\* OR aripiprazol\* OR clomipramin\* OR imipramin\* OR nortriptylin\* OR paroxetin\* OR sertralin\* OR duloxetin\* OR mirtazapin\* OR doxepin\* OR moclobemi\* OR venlafaxin\*):ab,ti) AND ('observational study'/exp OR 'cohort analysis'/exp OR 'longitudinal study'/exp OR 'retrospective study'/exp OR 'prospective study'/exp OR 'epidemiological data'/de OR 'case control study'/de OR 'cross-sectional study'/de OR 'correlational study'/de OR 'population research'/de OR 'family study'/de OR 'major clinical study'/de OR 'multicenter study'/de OR 'comparative study'/de OR 'follow up'/de OR 'clinical study'/de OR 'clinical article'/de OR 'clinical trial'/exp OR 'randomization'/exp OR 'intervention study'/de OR 'open study'/de OR 'community trial'/de OR 'controlled study'/de OR 'review'/exp OR 'systematic review'/exp OR 'meta-analysis'/de OR (((observation\* OR epidemiolog\* OR famil\* OR comparativ\* OR communit\*) NEAR/6 (stud\* OR data

OR research)) OR cohort\* OR longitudinal\* OR retrospectiv\* OR prospectiv\* OR population\* OR (national\* NEAR/3 (stud\* OR survey)) OR (health\* NEAR/3 survey\*) OR ((case OR cases OR match\*) NEAR/3 control\*) OR (cross NEXT/1 section\*) OR correlation\* OR multicenter\* OR multi-center\* OR follow-up\* OR followup\* OR clinical\* OR trial OR random\* OR review\* OR meta-analy\*):ab,ti pharmacogenetics psychiatry.
